# Supplementary material for: Systemic administration of Follistatin288 increases muscle mass and reduces fat accumulation in mice
Source: PubMed Central journal article supplement (PMC3743061; doi:10.1038/srep02441), 2013-08-14
Supplement: srep02441-s1.pdf [file srep02441-s1.pdf]

**Supplementary information**

**Systemic administration of Follistatin288 increases muscle mass and reduces fat accumulation in mice**

Samudra S Gangopadhyay\*

Section of Endocrinology, Diabetes, and Nutrition

Department of Medicine

Boston University School of Medicine

670 Albany Street, Boston, MA 02118

\*Current address:

Department of Urology, Boston Children's Hospital, 300 Longwood Avenue, Boston, MA 02115 and  
Department of Surgery, Harvard Medical School, Boston MA

Correspondence:

Samudra S Gangopadhyay

Department of Urology

Boston Children's Hospital

300 Longwood Avenue

Boston, MA 02115

Phone: 617-919-3186

Fax: 617-730-0248

E-mail: [Samudra.Gangopadhyay@childrens.harvard.edu](mailto:Samudra.Gangopadhyay@childrens.harvard.edu)

[samudrag1234@gmail.com](mailto:samudrag1234@gmail.com)

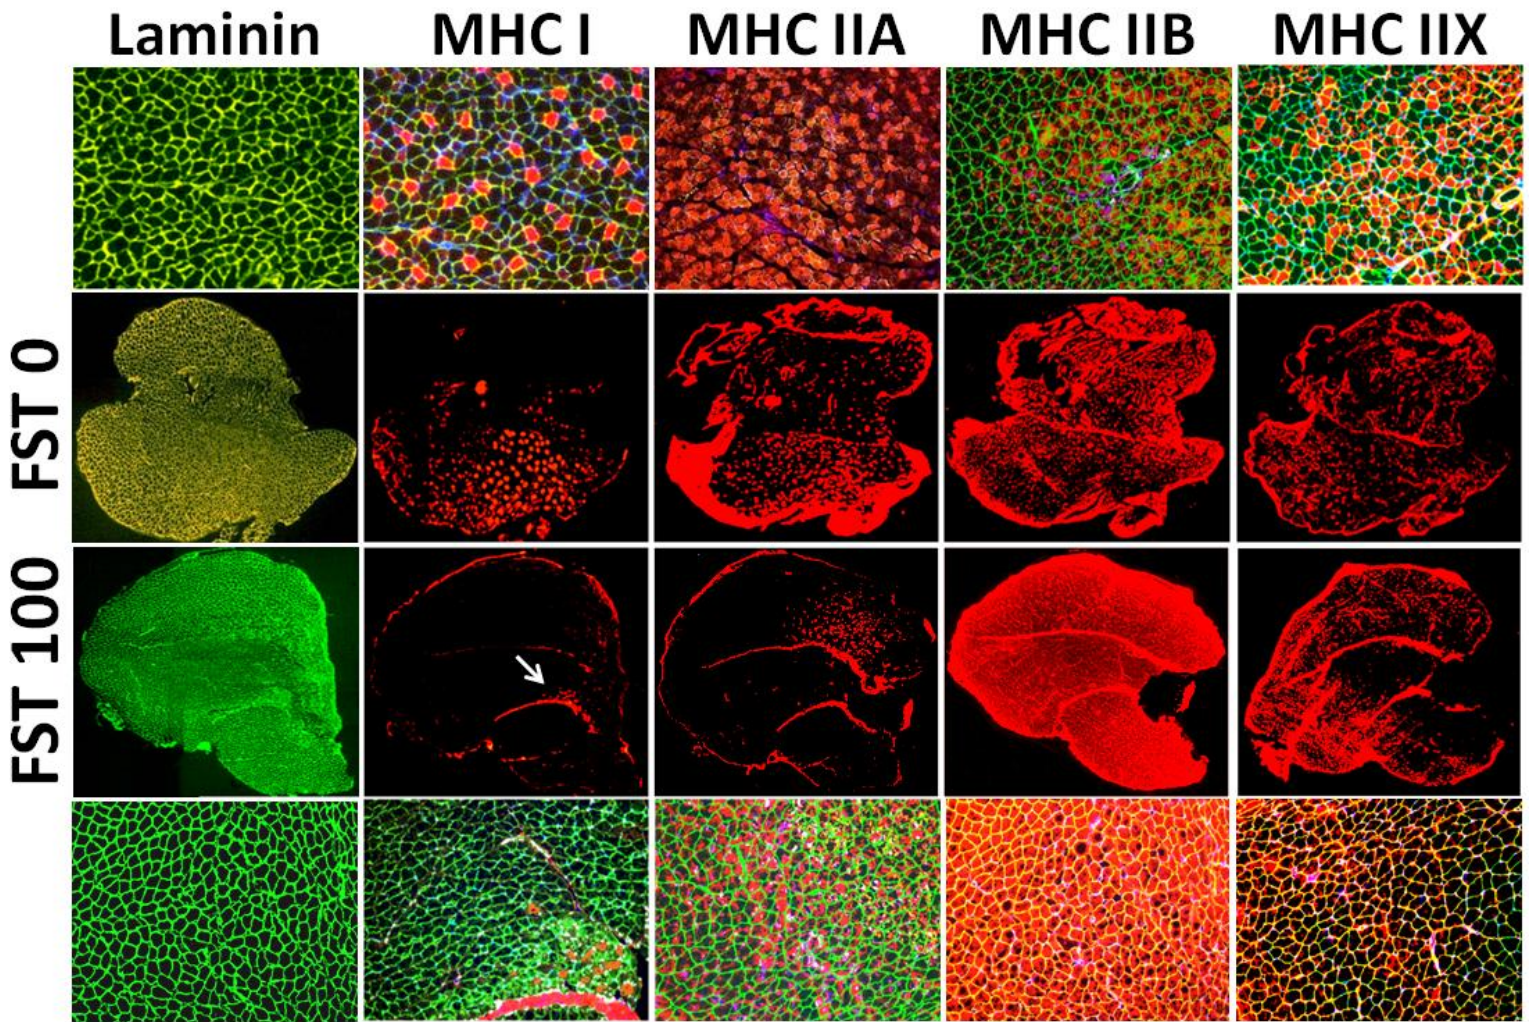

Supplementary figure S1. Isoforms of myosin heavy chains (MHC) stained with specific monoclonal antibodies (red) along with laminin staining (green) as indicated in Gastrocnemius. Higher magnification view from portions of the muscle co-stained for MHC (red), laminin (green) and DAPI (blue) are represented at the top or bottom corresponding to each muscle image.

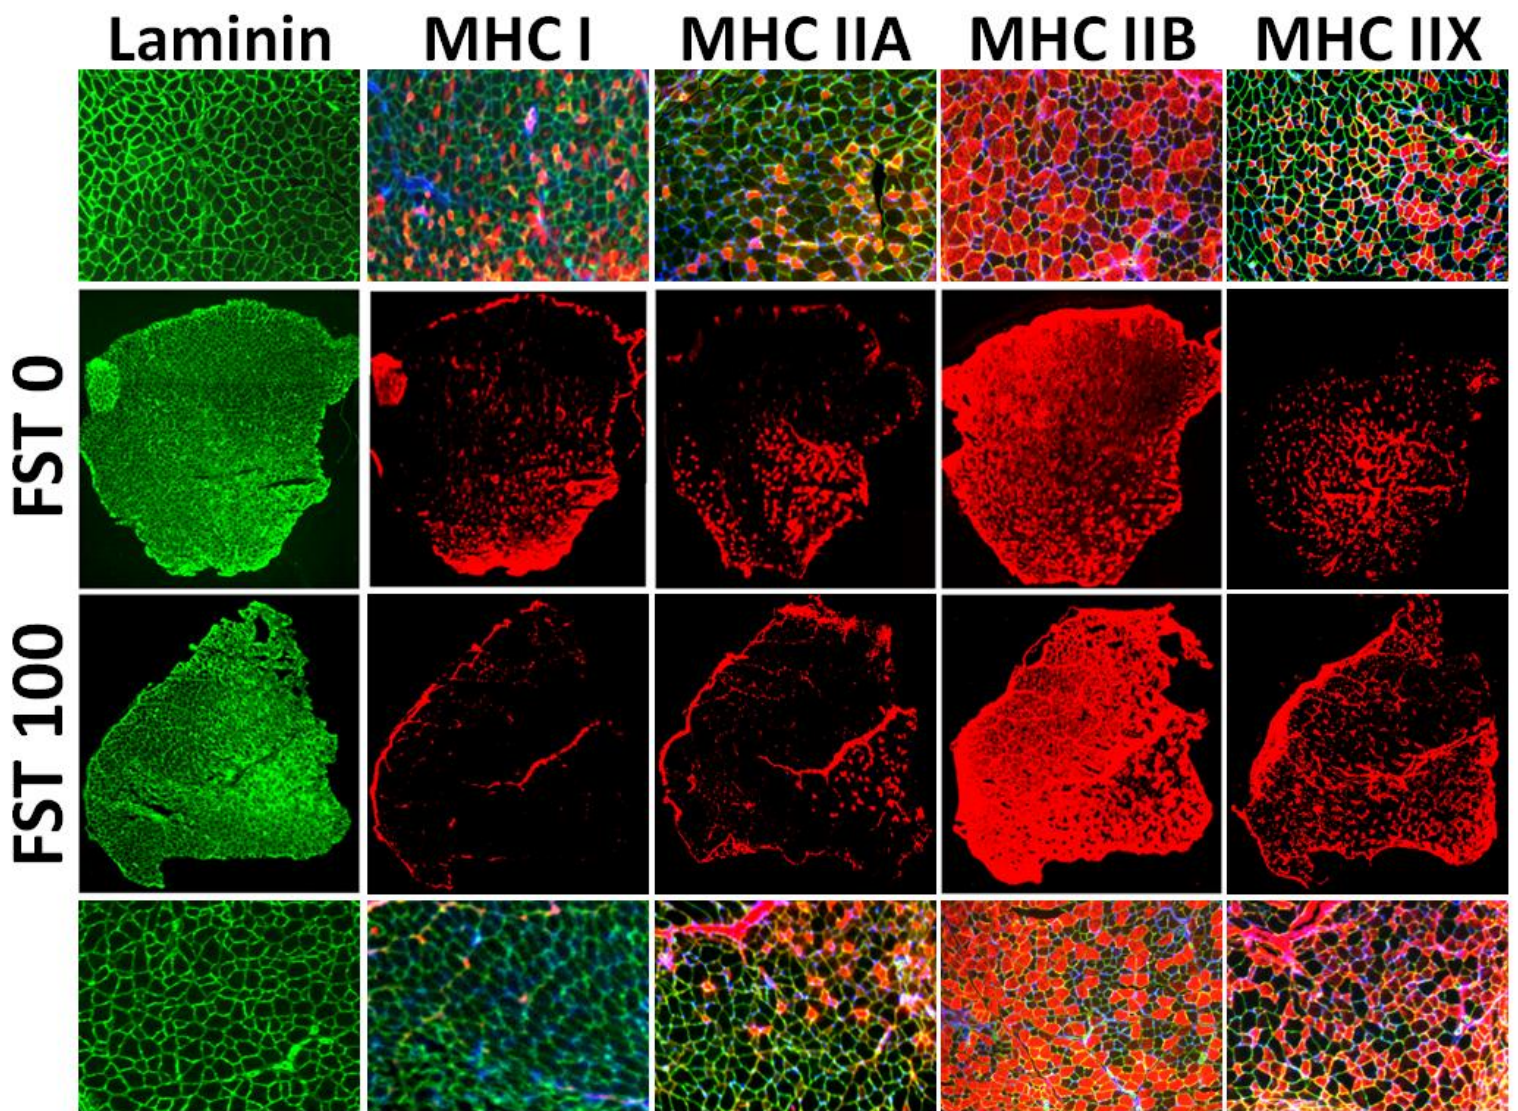

Supplementary figure S2. Isoforms of myosin heavy chains (MHC) stained with specific monoclonal antibodies (red) along with laminin staining (green) as indicated in Tibialis. Higher magnification view from portions of the muscle co-stained for MHC (red), laminin (green) and DAPI (blue) are represented at the top or bottom corresponding to each muscle image.

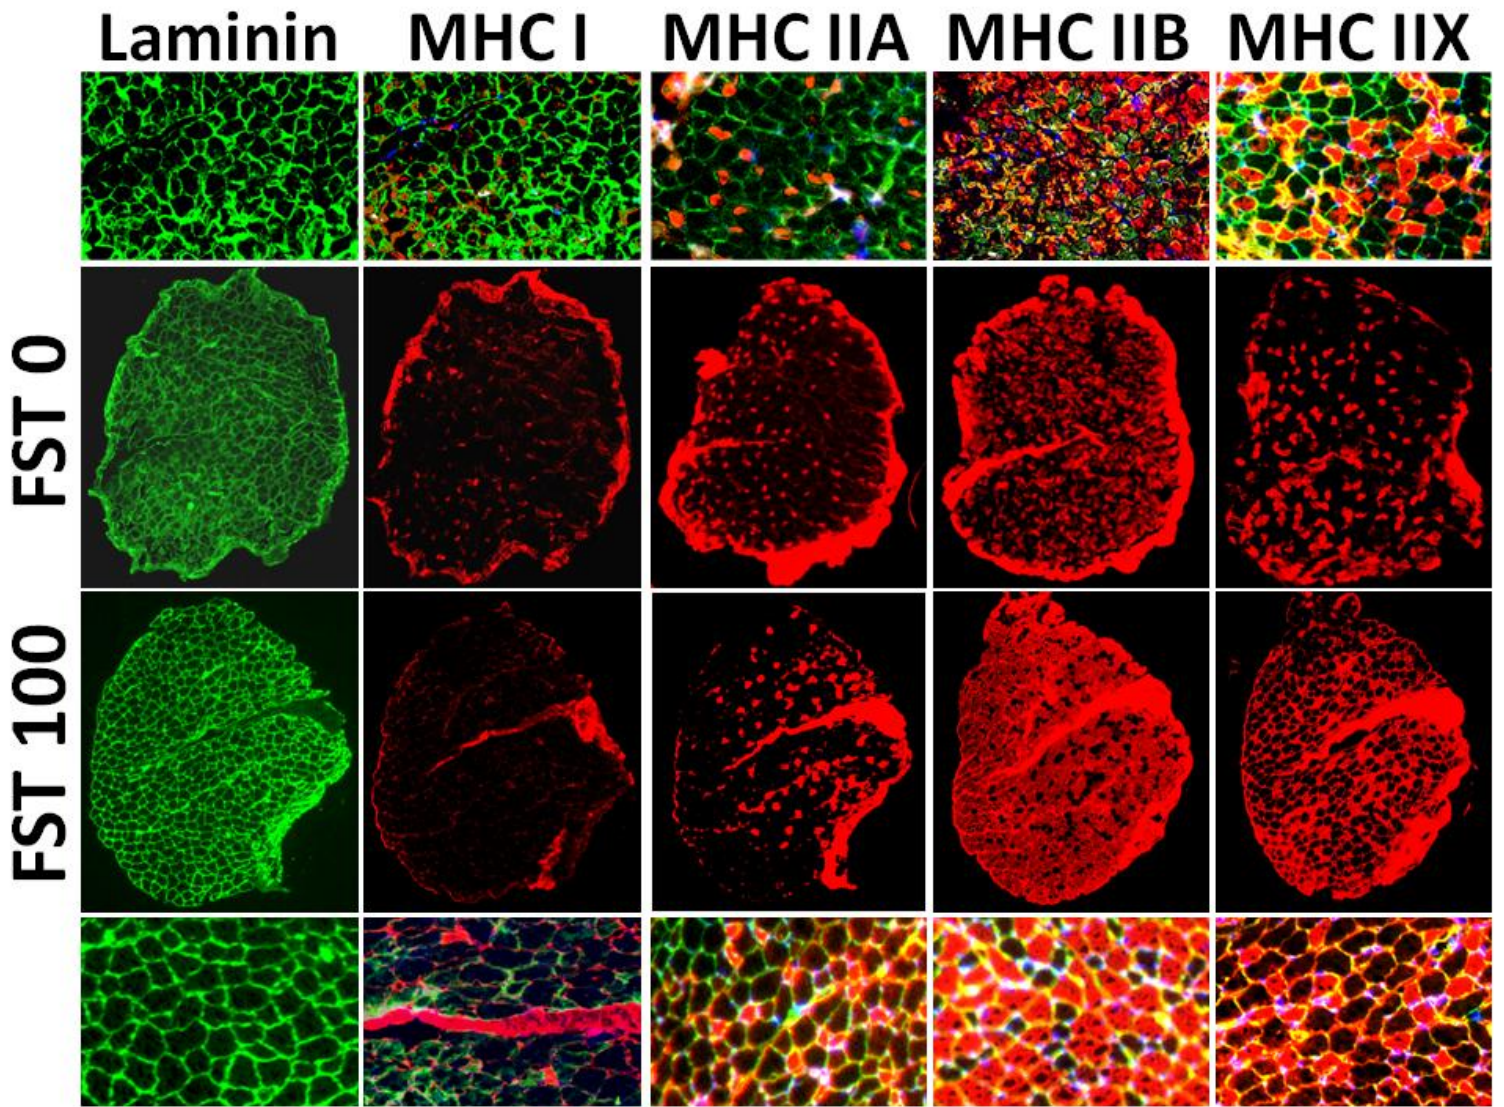

Supplementary figure S3. Isoforms of myosin heavy chains (MHC) stained with specific monoclonal antibodies (red) along with laminin staining (green) as indicated in Extensor Digitorum Longus (EDL). Higher magnification view from portions of the muscle co-stained for MHC (red), laminin (green) and DAPI (blue) are represented at the top or bottom corresponding to each muscle image.
